# Supplementary material for: Structure relationship of non-covalent interactions between lotus seedpod oligomeric procyanidins and glycated casein hydrolysate during digestion
Source: Royal Society of Chemistry journal article supplement (doi:10.1039/d3fo00614j), 2023-01-01
Supplement: d3fo00614j1.pdf [file d3fo00614j1.pdf]

1 **Supporting Information**

2 **Structure relationship of non-covalent interactions between lotus seedpod**

3 **oligomeric procyanidins and glycated casein hydrolysate during digestion**

4 Yu Ouyang<sup>a,b</sup>, Yinggang Liang<sup>a</sup>, Mengyao Niu<sup>a</sup>, Jia Yan<sup>a</sup>, Qianmei Chu<sup>c</sup>, Mengzhou

5 Zhou<sup>a</sup>, Wei Li<sup>a</sup>, Nianjie Feng<sup>a,\*</sup>, Qian Wu<sup>a,\*</sup>

6 a Cooperative Innovation Center of Industrial Fermentation (Ministry of Education &  
7 Hubei Province), Key Laboratory of Fermentation Engineering (Ministry of  
8 Education), National “111” Center for Cellular Regulation and Molecular  
9 Pharmaceutics, Hubei Key Laboratory of Industrial Microbiology, Hubei University  
10 of Technology, Wuhan, Hubei, 430068, China

11 b Agricultural College, Hubei Three Gorges Polytechnic, Yichang 443000, PR China

12 c Xiangyang Academy of Agricultural Sciences, Xiangyang, Hubei 441057, PR  
13 China

14 Email addresses: Yu Ouyang (oyy940098506@163.com), Yinggang Liang  
15 (liangyinggang2021@163.com), Mengyao Niu (nmy18239532535@163.com), Jia  
16 Yan (yj199721@163.com), Qianmei Chu (phya49@163.com), Mengzhou Zhou  
17 (zmzkelvin@163.com), Wei Li (ucee71@163.com)

18 Corresponding author: Email: Qian Wu (wuqian@hbut.edu.cn), Nianjie Feng  
19 (njfeng@hbut.edu.cn), Tel numbers: +86-13720167990

20 Mail address: Hubei University of Technology, Wuhan, Hubei, 430068, China

**Contents:**

**Supporting Information Figure S1.** The curve-fitting spectra of amide I band (1700-1600  $\text{cm}^{-1}$ ) of the GCSH-procyanidin complex.

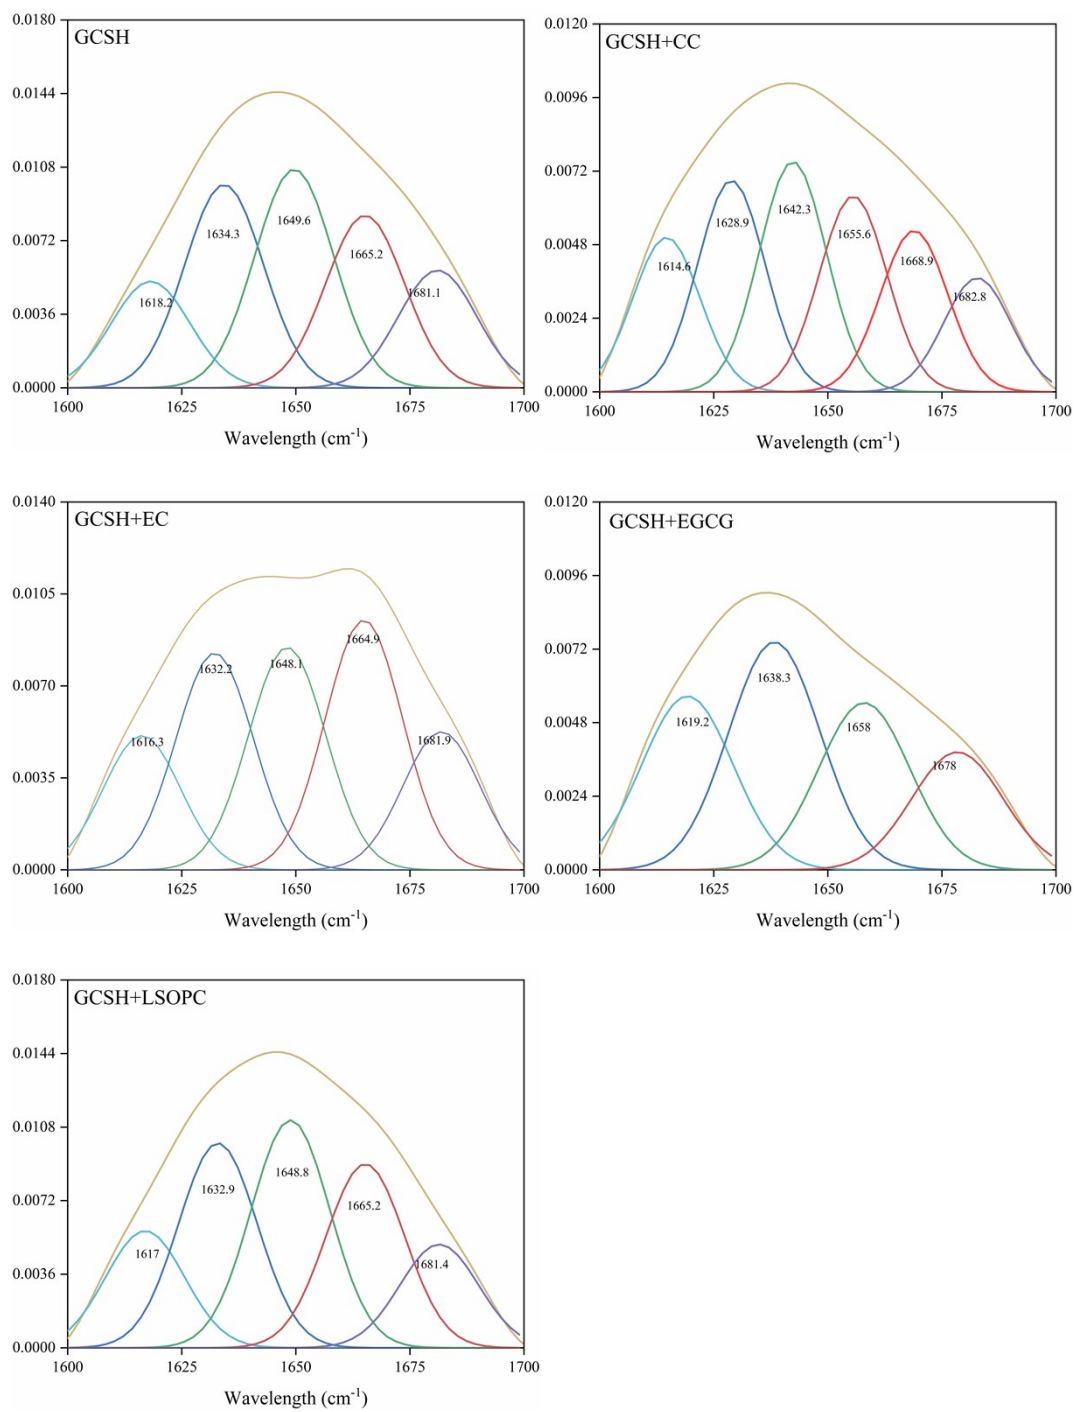

**Supporting Information Figure S1**
